# Supplementary material for: Al-Doped SrMoO3 Perovskites as Promising Anode Materials in Solid Oxide Fuel Cells
Source: MDPI journal article supplement (doi:10.3390/ma15113819), 2022-05-27
Supplement: s1 [file s1]

## Supporting Information

### **Al-doped SrMoO<sub>3</sub> Perovskites as promising anode materials in Solid Oxide Fuel Cells**

V. Cascos<sup>a,b,\*</sup>, M.T. Fernández-Díaz,<sup>c</sup> J.A. Alonso<sup>a</sup>,

<sup>a</sup> *Instituto de Ciencia de Materiales de Madrid, C.S.I.C., Cantoblanco E-28049 Madrid*

<sup>b</sup> *Departamento de Química Inorgánica, Universidad Complutense de Madrid, E-28040, Madrid, Spain*

<sup>c</sup> *Institut Laue Langevin, BP 156X, Grenoble, F-38042, France*

\*vcascos@ucm.es

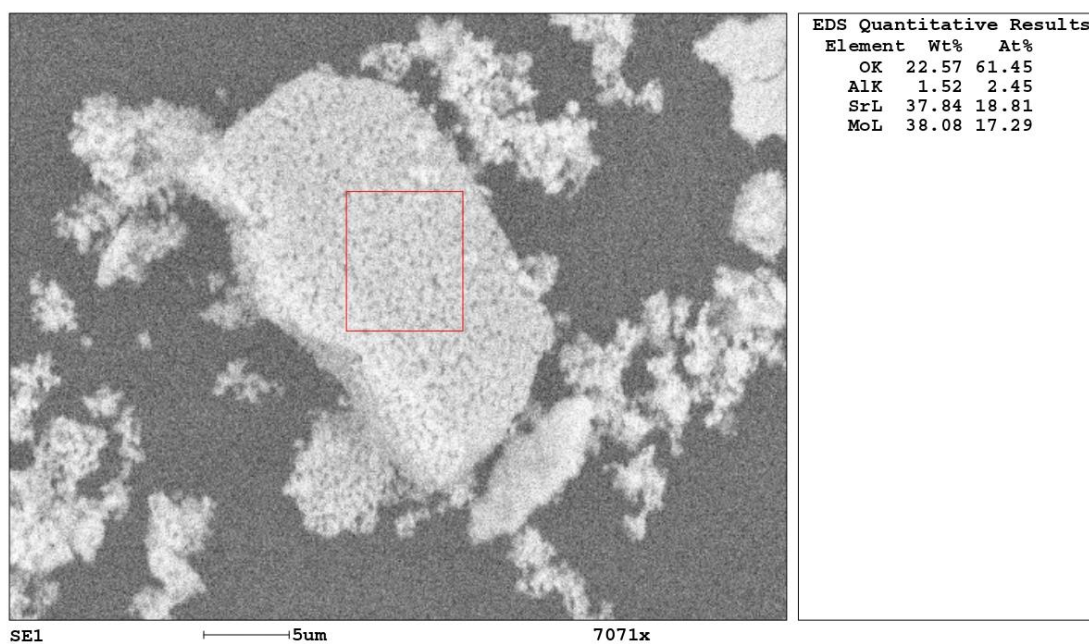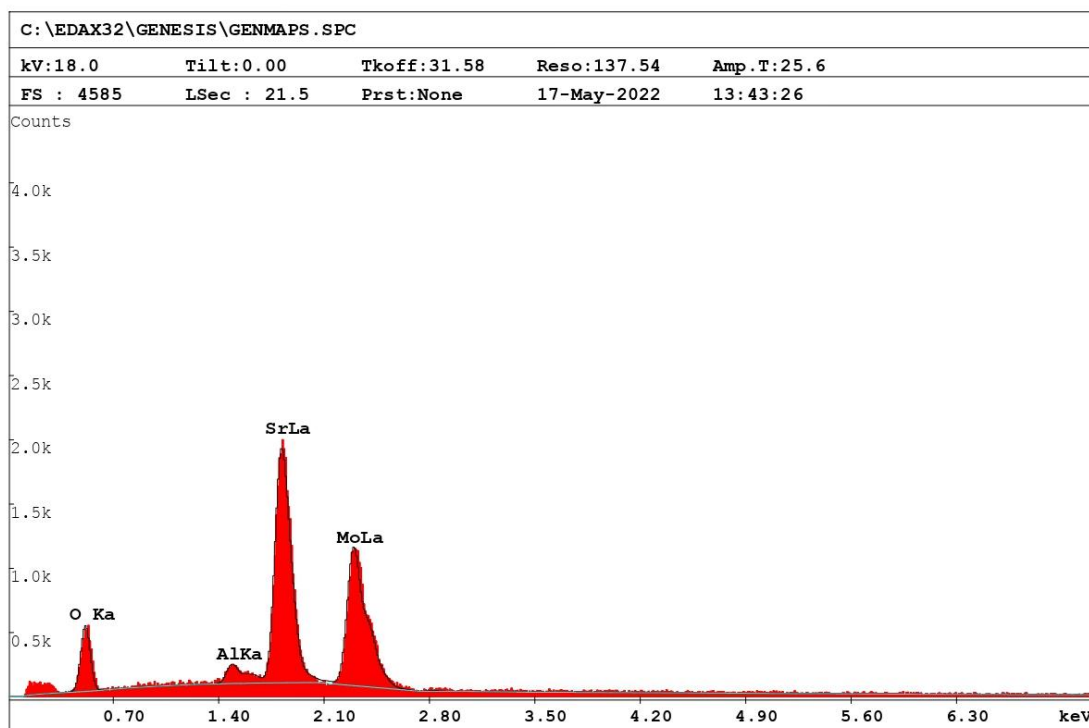

**Figure S1.** Upper panel: SEM image where the EDX spectrum was collected, and relative contents of Sr, Mo, Al and O. Lower panel: typical EDX spectrum.
